# Supplementary material for: Reveals of New Candidate Active Components in Hemerocallis Radix and Its Anti-Depression Action of Mechanism Based on Network Pharmacology Approach
Source: PubMed Central journal article supplement (PMC7084327; doi:10.3390/ijms21051868), 2020-03-09
Supplement: ijms-21-01868-s001.pdf [file ijms-21-01868-s001.pdf]

**Table S1.** Enrichment analysis of HR-DD targets based on Gene Ontology (GO) annotation.

| Ontology | ID         | Term                                            | p value                | p.adjust              | Count | Gene IDs                                                                    |
|----------|------------|-------------------------------------------------|------------------------|-----------------------|-------|-----------------------------------------------------------------------------|
| BP       | GO:0009410 | Response to xenobiotic stimulus                 | $1.83 \times 10^{-11}$ | $3.42 \times 10^{-8}$ | 12    | CYP2D6/EGFR/HDAC5/ALDH3A1/GRIN1/HDAC2/DBH/HDAC9/CYP2B6/CYP2C9/CYP2E1/GRIN2A |
| BP       | GO:0008542 | Visual learning                                 | $4.80 \times 10^{-9}$  | $3.06 \times 10^{-6}$ | 6     | CREB1/GRIN1/DBH/KIT/GRIN2A/APP<br>EGFR/DPP4/KLK8/CREB1/GRIN2D               |
| BP       | GO:0007610 | Behavior                                        | $6.12 \times 10^{-9}$  | $3.06 \times 10^{-6}$ | 13    | /GRIN1/HDAC2/DBH/KIT/GRIN2B/REN/GRIN2A/APP                                  |
| BP       | GO:0035235 | Ionotropic glutamate receptor signaling pathway | $6.55 \times 10^{-9}$  | $3.06 \times 10^{-6}$ | 5     | GRIN2D/GRIN1/GRIN2B/GRIN2A/APP                                              |
| BP       | GO:0007632 | Visual behavior                                 | $1.01 \times 10^{-8}$  | $3.76 \times 10^{-6}$ | 6     | CREB1/GRIN1/DBH/KIT/GRIN2A/APP                                              |
| BP       | GO:0042737 | Drug catabolic process                          | $3.92 \times 10^{-8}$  | $1.22 \times 10^{-5}$ | 7     | MAOB/CYP2D6/MAOA/ALDH2/DBH/CYP2B6/CYP2C9                                    |
| BP       | GO:0007611 | Learning or memory                              | $4.71 \times 10^{-8}$  | $1.26 \times 10^{-5}$ | 9     | EGFR/KLK8/CREB1/GRIN1/DBH/KIT/GRIN2B/GRIN2A/APP                             |
| BP       | GO:0001975 | Response to amphetamine                         | $5.86 \times 10^{-8}$  | $1.37 \times 10^{-5}$ | 5     | GRIN1/HDAC2/DBH/HDAC9/GRIN2A                                                |
| BP       | GO:0050890 | Cognition                                       | $1.26 \times 10^{-7}$  | $2.60 \times 10^{-5}$ | 9     | EGFR/KLK8/CREB1/GRIN1/DBH/KIT/GRIN2B/GRIN2A/APP                             |
| BP       | GO:0008306 | Associative learning                            | $1.39 \times 10^{-7}$  | $2.60 \times 10^{-5}$ | 6     | CREB1/GRIN1/DBH/KIT/GRIN2A/APP                                              |
| BP       | GO:0045471 | Response to ethanol                             | $1.64 \times 10^{-7}$  | $2.78 \times 10^{-5}$ | 7     | MAOB/GRIN1/HDAC2/DBH/GRIN2B/CYP2E1/GRIN2A                                   |
| BP       | GO:0009636 | Response to toxic substance                     | $1.82 \times 10^{-7}$  | $2.83 \times 10^{-5}$ | 11    | MAOB/CREB1/GRIN1/HDAC2/DBH/HDAC9/PDGFRB/GRIN2B/CYP2E1/GRIN2A/HDAC6          |
| BP       | GO:0070932 | Histone H3 deacetylation                        | $3.16 \times 10^{-7}$  | $4.54 \times 10^{-5}$ | 4     | HDAC5/HDAC2/HDAC9/HDAC6                                                     |
| BP       | GO:0008202 | Steroid metabolic process                       | $3.41 \times 10^{-7}$  | $4.55 \times 10^{-5}$ | 9     | CYP2D6/CYP27A1/KIT/CYP2B6/CYP2C9/CYP2E1/ESR1/HSD11B1/APP                    |
| BP       | GO:0014075 | Response to amine                               | $3.83 \times 10^{-7}$  | $4.77 \times 10^{-5}$ | 5     | GRIN1/HDAC2/DBH/HDAC9/GRIN2A                                                |
| BP       | GO:0071466 | Cellular response to xenobiotic stimulus        | $4.78 \times 10^{-7}$  | $5.58 \times 10^{-5}$ | 7     | CYP2D6/EGFR/ALDH3A1/GRIN1/CYP2B6/CYP2C9/CYP2E1                              |
| BP       | GO:0046677 | Response to antibiotic                          | $5.85 \times 10^{-7}$  | $6.44 \times 10^{-5}$ | 9     | MAOB/GRIN1/HDAC2/DBH/PDGFRB/GRIN2B/CYP2E1/GRIN2A/HDAC6                      |

|    |            |                                                             |                       |                       |   |                                           |
|----|------------|-------------------------------------------------------------|-----------------------|-----------------------|---|-------------------------------------------|
| BP | GO:0048167 | Regulation of synaptic plasticity                           | $6.68 \times 10^{-7}$ | $6.65 \times 10^{-5}$ | 7 | CREB1/GRIN2D/GRIN1/KIT/GRIN2B/GRIN2A/APP  |
| BP | GO:0006805 | Xenobiotic metabolic process                                | $6.84 \times 10^{-7}$ | $6.65 \times 10^{-5}$ | 6 | CYP2D6/ALDH3A1/GRIN1/CYP2B6/CYP2C9/CYP2E1 |
| BP | GO:0097366 | Response to bronchodilator                                  | $7.47 \times 10^{-7}$ | $6.65 \times 10^{-5}$ | 5 | GRIN1/HDAC2/DBH/HDAC9/GRIN2A              |
| CC | GO:0008328 | Ionotropic glutamate receptor complex                       | $1.30 \times 10^{-6}$ | 0.000173              | 4 | GRIN2D/GRIN1/GRIN2B/GRIN2A                |
| CC | GO:0098878 | Neurotransmitter receptor complex                           | $1.82 \times 10^{-6}$ | 0.000173              | 4 | GRIN2D/GRIN1/GRIN2B/GRIN2A                |
| CC | GO:0000118 | Histone deacetylase complex                                 | $9.67 \times 10^{-6}$ | 0.000612              | 4 | HDAC5/HDAC2/HDAC9/HDAC6                   |
| CC | GO:0043235 | Receptor complex                                            | $1.94 \times 10^{-5}$ | 0.000922              | 7 | ERBB4/EGFR/GRIN2D/GRIN1/GRIN2B/GRIN2A/APP |
| CC | GO:0099061 | Integral component of postsynaptic density membrane         | 0.00024               | 0.008987              | 3 | ERBB4/GRIN1/GRIN2A                        |
| CC | GO:0099146 | Intrinsic component of postsynaptic density membrane        | 0.000284              | 0.008987              | 3 | ERBB4/GRIN1/GRIN2A                        |
| CC | GO:0098839 | Postsynaptic density membrane                               | 0.000508              | 0.013339              | 3 | ERBB4/GRIN1/GRIN2A                        |
| CC | GO:0045177 | Apical part of cell                                         | 0.000562              | 0.013339              | 6 | EGFR/DPP4/ABC1/PDGFRB/REN/APP             |
| CC | GO:0099060 | Integral component of postsynaptic specialization membrane  | 0.000869              | 0.017824              | 3 | ERBB4/GRIN1/GRIN2A                        |
| CC | GO:0098948 | Intrinsic component of postsynaptic specialization membrane | 0.000967              | 0.017824              | 3 | ERBB4/GRIN1/GRIN2A                        |
| CC | GO:0098802 | Plasma membrane receptor complex                            | 0.001032              | 0.017824              | 4 | GRIN2D/GRIN1/GRIN2B/GRIN2A                |
| CC | GO:0034703 | Cation channel complex                                      | 0.001156              | 0.018303              | 4 | GRIN2D/GRIN1/GRIN2B/GRIN2A                |
| CC | GO:0099634 | Postsynaptic specialization membrane                        | 0.001627              | 0.023783              | 3 | ERBB4/GRIN1/GRIN2A                        |
| MF | GO:0017136 | NAD-dependent histone deacetylase activity                  | $9.76 \times 10^{-8}$ | $1.05 \times 10^{-5}$ | 4 | HDAC5/HDAC2/HDAC9/HDAC6                   |
| MF | GO:0034979 | NAD-dependent protein deacetylase activity                  | $1.36 \times 10^{-7}$ | $1.05 \times 10^{-5}$ | 4 | HDAC5/HDAC2/HDAC9/HDAC6                   |

|    |            |                                                                                                  |                       |                       |   |                                             |
|----|------------|--------------------------------------------------------------------------------------------------|-----------------------|-----------------------|---|---------------------------------------------|
| MF | GO:0004497 | Monoxygenase activity                                                                            | $1.70 \times 10^{-7}$ | $1.05 \times 10^{-5}$ | 6 | CYP2D6/CYP27A1/DBH/CYP2B6/<br>CYP2C9/CYP2E1 |
| MF | GO:0004970 | Ionotropic glutamate<br>receptor activity                                                        | $1.85 \times 10^{-7}$ | $1.05 \times 10^{-5}$ | 4 | GRIN2D/GRIN1/GRIN2B/GRIN2A                  |
| MF | GO:0004407 | Histone deacetylase activity                                                                     | $3.22 \times 10^{-7}$ | $1.45 \times 10^{-5}$ | 4 | HDAC5/HDAC2/HDAC9/HDAC6                     |
| MF | GO:0033558 | Protein deacetylase activity                                                                     | $4.13 \times 10^{-7}$ | $1.55 \times 10^{-5}$ | 4 | HDAC5/HDAC2/HDAC9/HDAC6                     |
| MF | GO:0004714 | Transmembrane receptor<br>protein tyrosine kinase<br>activity                                    | $5.54 \times 10^{-7}$ | $1.79 \times 10^{-5}$ | 5 | ERBB4/EGFR/PDGFRB/KIT/CSF1R                 |
| MF | GO:0099604 | Ligand-gated calcium<br>channel activity                                                         | $6.50 \times 10^{-7}$ | $1.84 \times 10^{-5}$ | 4 | GRIN2D/GRIN1/GRIN2B/GRIN2A                  |
| MF | GO:0008066 | Glutamate receptor activity                                                                      | $1.18 \times 10^{-6}$ | $2.96 \times 10^{-5}$ | 4 | GRIN2D/GRIN1/GRIN2B/GRIN2A                  |
| MF | GO:0019213 | Deacetylase activity                                                                             | $1.41 \times 10^{-6}$ | $3.19 \times 10^{-5}$ | 4 | HDAC5/HDAC2/HDAC9/HDAC6                     |
| MF | GO:0019199 | Transmembrane receptor<br>protein kinase activity                                                | $2.13 \times 10^{-6}$ | $4.37 \times 10^{-5}$ | 5 | ERBB4/EGFR/PDGFRB/KIT/CSF1R                 |
| MF | GO:0016811 | Hydrolase activity, acting<br>on carbon-nitrogen (but not<br>peptide) bonds, in linear<br>amides | $1.56 \times 10^{-5}$ | 0.000294              | 4 | HDAC5/HDAC2/HDAC9/HDAC6                     |
| MF | GO:0022824 | Transmitter-gated ion<br>channel activity                                                        | $1.87 \times 10^{-5}$ | 0.000302              | 4 | GRIN2D/GRIN1/GRIN2B/GRIN2A                  |
| MF | GO:0022835 | Transmitter-gated channel<br>activity                                                            | $1.87 \times 10^{-5}$ | 0.000302              | 4 | GRIN2D/GRIN1/GRIN2B/GRIN2A                  |
| MF | GO:0001085 | RNA polymerase II<br>transcription factor binding                                                | $2.64 \times 10^{-5}$ | 0.000398              | 5 | HDAC5/CREB1/HDAC2/ESR1/AR                   |
| MF | GO:0005230 | Extracellular ligand-gated<br>ion channel activity                                               | $3.34 \times 10^{-5}$ | 0.000472              | 4 | GRIN2D/GRIN1/GRIN2B/GRIN2A                  |
| MF | GO:0004713 | Protein tyrosine kinase<br>activity                                                              | $4.76 \times 10^{-5}$ | 0.000633              | 5 | ERBB4/EGFR/PDGFRB/KIT/CSF1R                 |
| MF | GO:0005506 | Iron ion binding                                                                                 | $5.40 \times 10^{-5}$ | 0.000678              | 5 | CYP2D6/CYP27A1/CYP2B6/CYP2C<br>9/CYP2E1     |
| MF | GO:0005262 | Calcium channel activity                                                                         | 0.000108              | 0.001286              | 4 | GRIN2D/GRIN1/GRIN2B/GRIN2A                  |
| MF | GO:0030594 | Neurotransmitter receptor<br>activity                                                            | 0.000142              | 0.001599              | 4 | GRIN2D/GRIN1/GRIN2B/GRIN2A                  |

---
